# Supplementary material for: Digital Microfluidic Multiplex RT-qPCR for SARS-CoV-2 Detection and Variants Discrimination
Source: MDPI journal article supplement (doi:10.3390/mi14081627), 2023-08-17
Supplement: s1 [file s1]

Supplementary information to

# Digital Microfluidic RT-qPCR Cartridge for Detection of SARS-CoV-2 and Discrimination of Delta and Omicron Variants

Kuan-Lun Ho <sup>1</sup>, Jing Ding <sup>1</sup>, Jia-Shao Fan <sup>2</sup>, Wai Ning Tiffany Tsui <sup>3</sup>, Jianfa Bai <sup>3</sup>, and Shih-Kang Fan <sup>1,\*</sup>

<sup>1</sup> Department of Mechanical and Nuclear Engineering, Kansas State University, Manhattan, KS 66506, USA

<sup>2</sup> Department of Electrical and computer Engineering, Kansas State University, Manhattan, KS 66506, USA

<sup>3</sup> Department of Diagnostic Medicine/Pathobiology, Kansas State University, Manhattan, KS 66506, USA

\* Correspondence: skfan@ksu.edu

## Supplementary Information includes:

**Table S1.** Primers and probes used in this study.

**Table S2.** RT-qPCR reaction mix solutions for detection and discrimination of SARS-CoV-2 wildtype, Delta variant, and Omicron variant.

**Table S3.** RT-qPCR reaction mix solutions for detection of SARS-CoV-2 Omicron variant.

**Figure S1.** Off-chip RT-qPCR of serially diluted SARS-CoV-2 Omicron variant RNA. (a) RT-qPCR amplification curves for various concentrations. (b) Standard curve and RT-qPCR efficiency off-chip.

**Figure S2.** The uncropped initial (cycle 0) and end-point (cycle 45) fluorescence images of RT-qPCR for clinical analog samples representing (a) wildtype infection, (b) Delta variant infection, (c) Omicron variant infection, and (d) no infection.

**Figure S3.** Off-chip RT-qPCR verification of SARS-CoV-2 wildtype RNA detection and Delta and Omicron variants discrimination. Amplification curves for clinical analog samples representing (a) wildtype infection, (b) Delta variant infection, (c) Omicron variant infection, and (d) no infection.

**Table S1.** Primers and probes used in this study.

| Primer/probe name | Sequence (5'-3')              | Amplicon size         |
|-------------------|-------------------------------|-----------------------|
| 2019-nCoV_N1-F    | GACCCCAAAATCAGCGAAAT          | 72 bp                 |
| 2019-nCoV_N1-R    | TCTGGTTACTGCCAGTTGAATCTG      |                       |
| 2019-nCoV_N1-P    | FAM-ACCCCGCATTACGTTTGGTGGACC  |                       |
| SARS2-dF          | CCACAAAAACAACAAAAGTTGG        | 78 bp for Delta       |
| SARS2-dR          | TGAGAGACATATTCAAAAGTGCAA      | 84 bp for non-Delta   |
| SARS2-dPr         | FAM-ATAAACTCCACTTTCCA-MGB     |                       |
| SARS2-wPr         | AGAATAAACTCTGAACTCACTTTCCATCC |                       |
| OmN-F             | GGACCCTCAGATTCAACTGG          | 86 bp for Omicron     |
| OmN-R             | GCAGTATTATTGGGTAAACCTTGG      | 95 bp for non-Omicron |
| OmNm-Pr           | FAM-ATCGCGCCCCACCATTCT        |                       |
| OmNw-Pr           | CGCCCCACTGCGTTCTCC            |                       |
| 18S-F             | GGAGTATGGTTGCAAAGCTGA         | 100 bp                |
| 18S-R             | GGTGAGGTTTCCCGTGTTG           |                       |
| 18S-Pr            | FAM-AAGGAATTGACGGAAGGGCA      |                       |

**Table S2.** RT-qPCR reaction mix solutions for detection and discrimination of SARS-CoV-2 wildtype, Delta variant, and Omicron variant.

| Droplet (1.5 µl)                           |                                                      | A           | B     | C       | D   | E    |
|--------------------------------------------|------------------------------------------------------|-------------|-------|---------|-----|------|
| Target Gene                                |                                                      | N1          | Delta | Omicron | 18S | NTC  |
| RT-qPCR Component                          |                                                      | Volume (µl) |       |         |     |      |
| TaqPath™ 1-Step RT-qPCR Master Mix (4X)    |                                                      | 5           | 5     | 5       | 5   | 5    |
| Nuclease free water w/ 0.4% (v/v) tween-20 |                                                      | 5           | 5     | 5       | 5   | 5    |
| Nuclease free water                        |                                                      | 3           | 2.5   | 2.25    | 3   | 0.75 |
| N1                                         | N1 Primer mix (10 µM)                                | 1           | 0     | 0       | 0   | 1    |
|                                            | N1-P (10 µM, FAM)                                    | 1           | 0     | 0       | 0   | 1    |
| Delta                                      | SARS2-d Primer mix (10 µM)                           | 0           | 1     | 0       | 0   | 1    |
|                                            | SARS2-dPr (10 µM, FAM)                               | 0           | 0.5   | 0       | 0   | 0.5  |
|                                            | SARS2-wPr (15 µM)                                    | 0           | 1     | 0       | 0   | 1    |
| Omicron                                    | OmN Primer mix (10 µM)                               | 0           | 0     | 1       | 0   | 1    |
|                                            | OmNm-Pr (10 µM, FAM)                                 | 0           | 0     | 0.75    | 0   | 0.75 |
|                                            | OmNw-Pr (15 µM)                                      | 0           | 0     | 1       | 0   | 1    |
| 18S                                        | 18S Primer mix (10 µM)                               | 0           | 0     | 0       | 1   | 1    |
|                                            | 18S-Pr (10 µM, FAM)                                  | 0           | 0     | 0       | 1   | 1    |
| Sample                                     | SARS-CoV-2 RNA (WT, Delta, or Omicron, 80 copies/µl) | 2.5         | 2.5   | 2.5     | 2.5 | 0    |
|                                            | 18S rDNA (7.44 pg/µl)                                | 2.5         | 2.5   | 2.5     | 2.5 | 0    |
| Total volume                               |                                                      | 20          | 20    | 20      | 20  | 20   |

**Table S3.** RT-qPCR reaction mix solutions for detection of SARS-CoV-2 Omicron variant.

| <b>RT-qPCR Component</b>                                    | <b>Volume (μl)</b> |
|-------------------------------------------------------------|--------------------|
| TaqPath™ 1-Step RT-qPCR Master Mix (4X)                     | 5                  |
| Nuclease free water w/ 0.4% (v/v) tween-20                  | 5                  |
| Nuclease free water                                         | 3.25               |
| OmN Primer mix (10 μM)                                      | 1                  |
| OmNm-Pr (10 μM, FAM)                                        | 0.75               |
| Omicron RNA Template<br>(100,000 copies/μl to 10 copies/μl) | 5                  |
| <b>Total</b>                                                | <b>20</b>          |

**(a) Omicron gene**

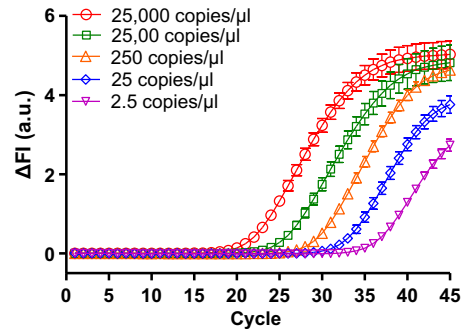

**(b) Omicron gene standard curve**

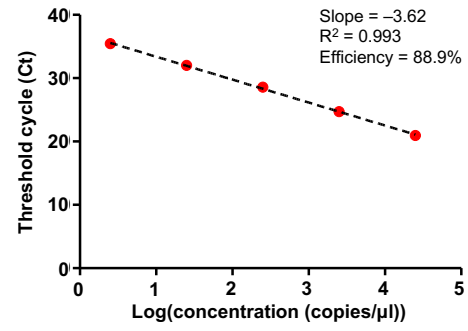

**Figure S1.** Off-chip RT-qPCR of serially diluted SARS-CoV-2 Omicron variant RNA. (a) RT-qPCR amplification curves for various concentrations. (b) Standard curve and RT-qPCR efficiency off-chip.

**(a) Wildtype Analog**

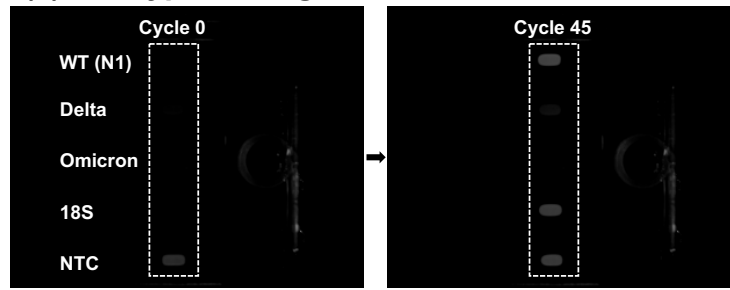

**(b) Delta Analog**

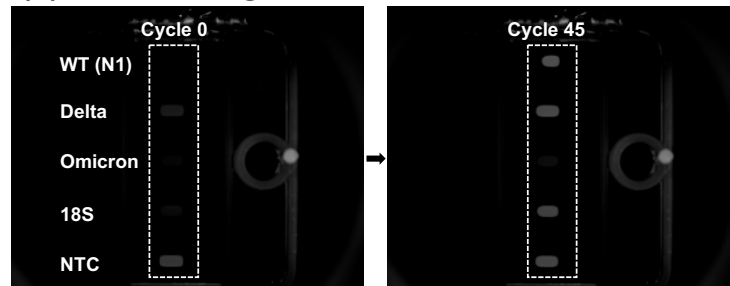

**(c) Omicron Analog**

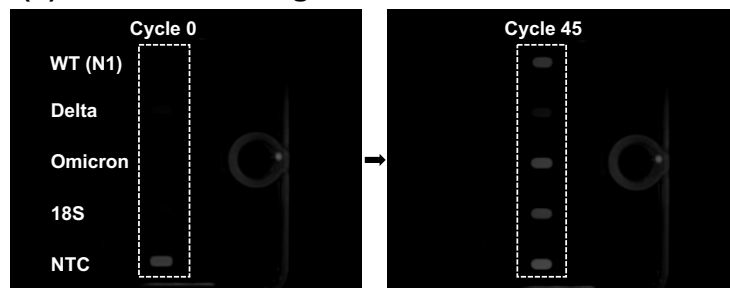

**(d) Negative**

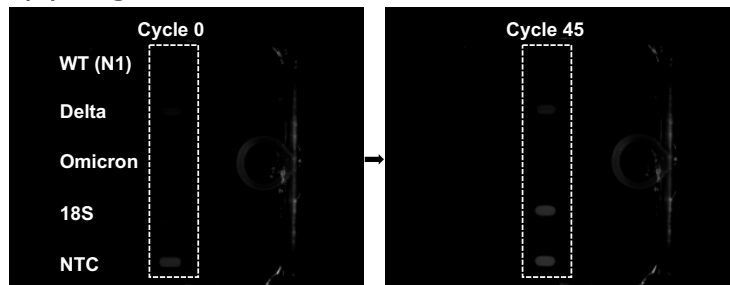

**Figure S2.** The uncropped initial (cycle 0) and end-point (cycle 45) fluorescence images of RT-qPCR for clinical analog samples representing (a) wildtype infection, (b) Delta variant infection, (c) Omicron variant infection, and (d) no infection.

**(a) Wildtype analog**

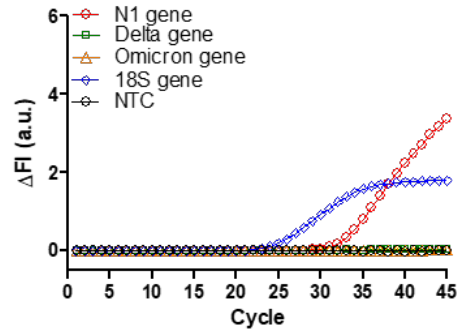

**(b) Delta analog**

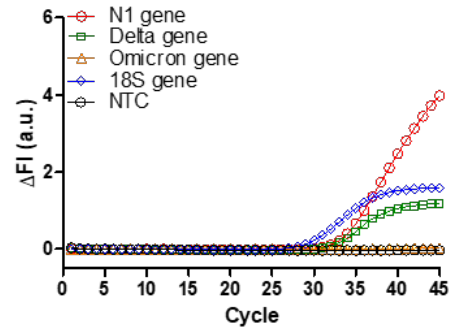

**(c) Omicron analog**

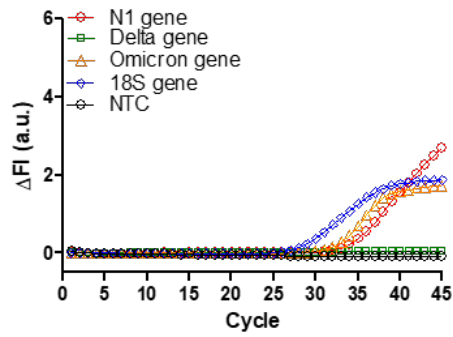

**(d) Negative**

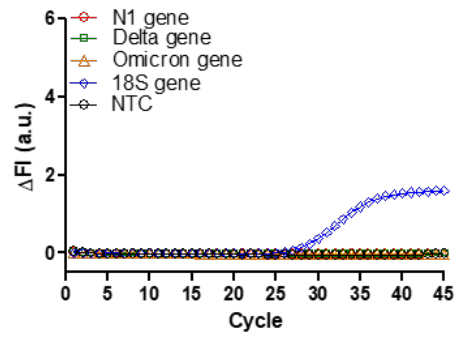

**Figure S3.** Off-chip RT-qPCR verification of SARS-CoV-2 wildtype RNA detection and Delta and Omicron variants discrimination. Amplification curves for clinical analog samples representing (a) wildtype infection, (b) Delta variant infection, (c) Omicron variant infection, and (d) no infection.
